# Supplementary material for: Zika virus evades interferon-mediated antiviral response through the co-operation of multiple nonstructural proteins in vitro
Source: PubMed Central journal article supplement (PMC5359216; doi:10.1038/celldisc.2017.6), 2017-03-21
Supplement: celldisc20176-s1.pdf [file celldisc20176-s1.pdf]

**Figure S1**

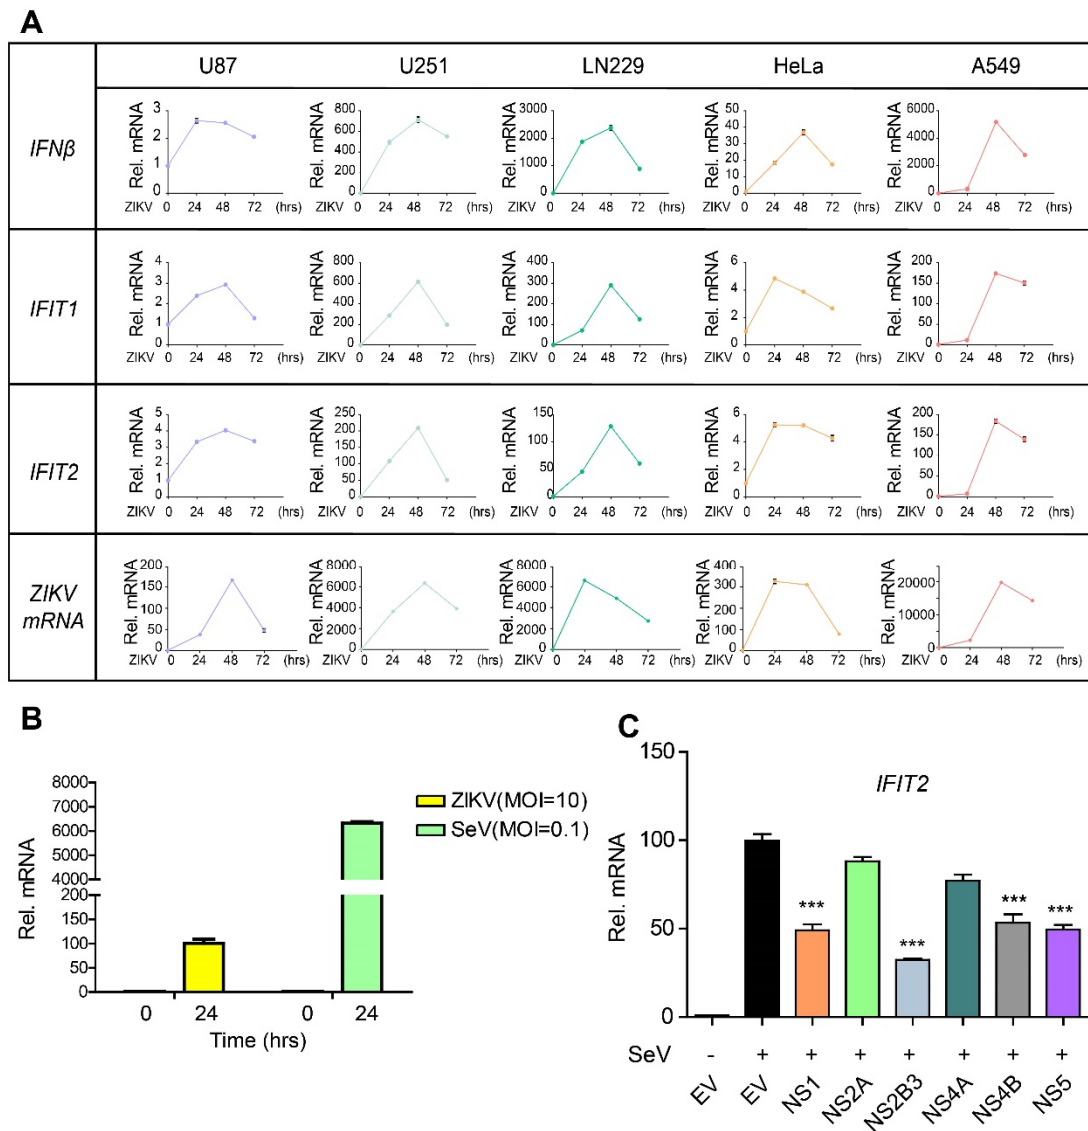

**Supplementary Figure S1. ZIKV infection triggers type I IFN antiviral response.**

(A) qRT-PCR analysis of *IFN $\beta$* , *IFIT1*, *IFIT2* mRNA and *ZIKV genomic RNA* in U87, U251, LN229, HeLa and A549 cells after ZIKV infection (MOI=1) for indicated time periods. (B) qRT-PCR analysis of *IFN $\beta$*  mRNA in A549 cells infected with ZIKV (MOI=10) or SeV (MOI=0.1) for 24 hrs. (C) qRT-PCR analysis of *IFIT2* mRNA in 293T cells transfected with NS1, NS2A, NS2B3, NS4A, NS4B and NS5 followed by SeV infection. Data in A, B and C are expressed as means  $\pm$  SD of at least three independent experiments. \*\*\*  $p < 0.001$ .

**Figure S2**

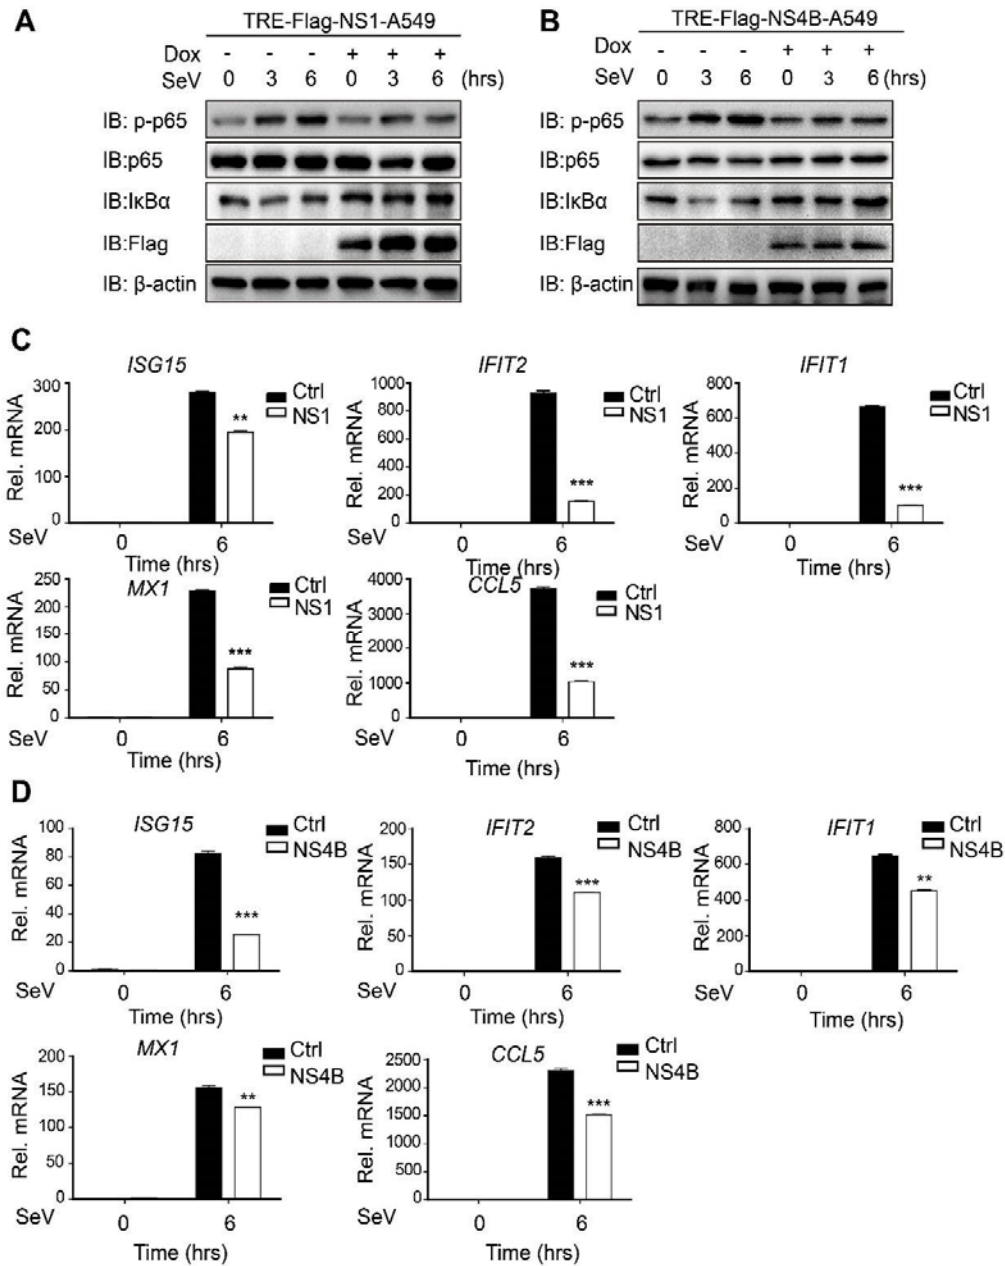

**Supplementary Figure S2. ZIKV NS1 and NS4B inhibit IFN $\beta$  and ISGs expression.**

(A-B) Immunoassay of extracts of NS1- or NS4B- inducible A549 cells, which were treated with doxycycline (Dox) (200 ng/mL) for 24 hrs, followed by SeV (MOI=0.1) for the indicated time points. (C) qRT-PCR analysis of *ISG15*, *IFIT2*, *IFIT1*, *MX1* and *CCL5* mRNA in NS1-inducible A549 cells after SeV infection for 4 hrs. (D) qRT-PCR analysis of *ISG15*, *IFIT2*, *IFIT1*, *MX1* and *CCL5* mRNA in NS4B-inducible A549 cells after SeV infection for 4 hrs. Data in C and D are expressed as means  $\pm$  SD of at least three independent experiments. \*\* $p < 0.01$ , \*\*\* $p < 0.001$ .

**Figure S3**

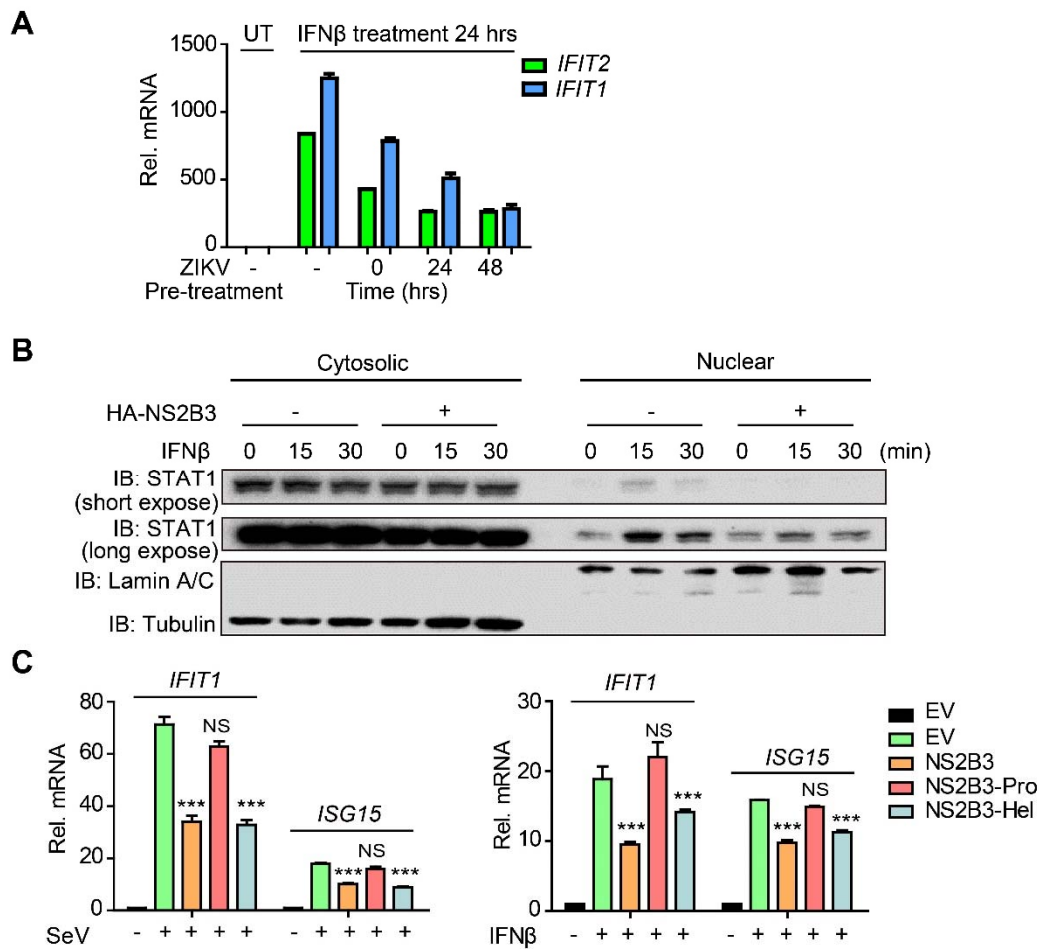

**Supplementary Figure S3. ZIKV and its NS2B3 inhibit STAT1 nuclear translocation and ISGs expression.**

(A) qRT-PCR analysis of A549 cells pre-infected by ZIKV, followed by IFN $\beta$  treatment. UT, untreated. (B) Immunoassay of cytoplasmic and nuclear extracts of 293T cells transfected with empty vector (EV) or HA-NS2B3 followed by IFN $\beta$  treatment for the indicated time points. Purity of cytoplasmic and nuclear fraction is depicted by tubulin and lamin A/C. (C) qRT-PCR analysis of *IFIT1* and *ISG15* mRNA in 293T cells transfected with NS2B3, NS2B3 protease domain or NS2B3 helicase domain after SeV infection or IFN $\beta$  treatment. Data in A and C are expressed as means  $\pm$  SD of at least three independent experiments. \*\*\*  $p < 0.001$ .

**Figure S4**

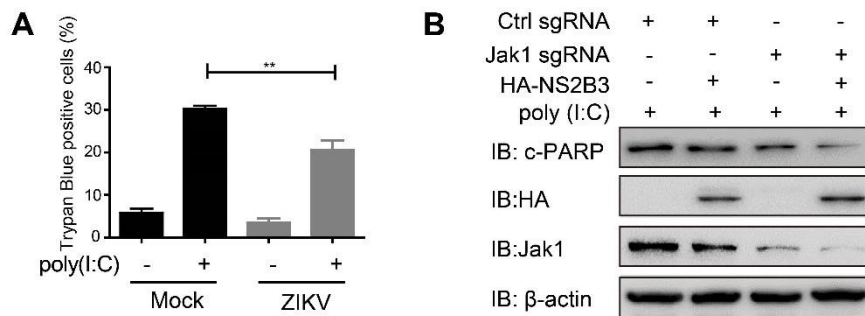

**Supplementary Figure S4. ZIKV inhibits cytoplasmic poly (I:C)-induced cell death.** (A)

HT1080 cells pre-infected with ZIKV were treated by cytoplasmic poly (I:C). Trypan blue

positive dead cells were then counted. (B) Immunoassay of extracts of indicated HT-1080 cells

transfected with HA-NS2B3 and cytoplasmic poly(I:C). Data in A are expressed as means  $\pm$

SD of at least three independent experiments. \*\* $p < 0.01$ .

**Figure S5**

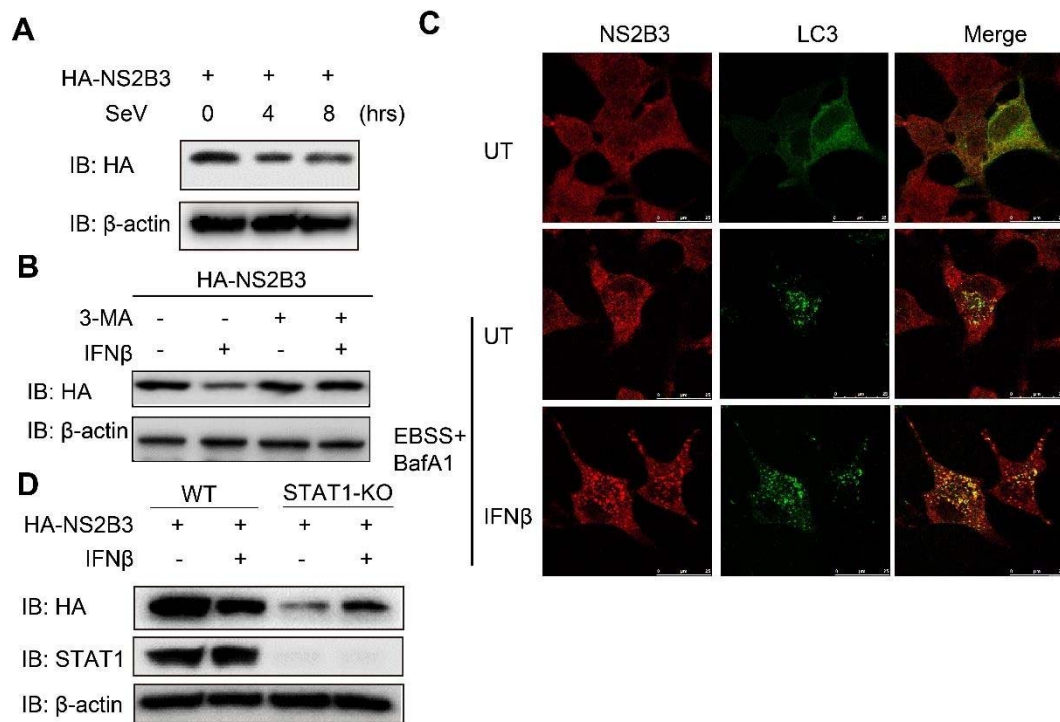

**Supplementary Figure S5. IFN $\beta$  promotes the autophagic degradation of NS2B3.** (A) Immunoassay of extracts of 293T cells transfected with HA-NS2B3 followed by SeV infection for the indicated time points. (B) Immunoassay of extracts of 293T cells treated with or without IFN $\beta$  after transfected with HA-NS2B3 and treated with DMSO or 3-MA (20 mM) for 4 hrs. (C) Confocal microscopy analysis of HeLa cells transfected with NS2B3 and LC3 treated with IFN $\beta$ , EBSS and BafA1 or not. UT: untreated. (D) Immunoassay of extracts of WT, and STAT1knockout (KO) 293T cells transfected with HA-NS2B3, followed by IFN $\beta$  treatment.
